# Supplementary material for: Comparative Study of a Modified Suture Technique with a Minimal Renal Pelvis Incision in Paediatric Hydronephrosis Treatment
Source: Research Square preprint supplement (doi:10.21203/rs.3.rs-7622736/v1), 2025-10-28
Supplement: Supplementary file 1 [file d759998d23a266503c2f1f81.xlsx]

## Sheet: Sheet1
对照组	年龄（月）	术后住院时间（天）	术前B超（mm）	术后B超（mm）	满意度	手术时间（min）	术中出血量 ml	术后血尿时间 天			改良组	年龄（月）	术后住院时间（天）	术前B超（mm）	术后B超（mm）	满意度	手术时间（min）	术中出血量 ml	术后血尿时间 天
1	70	10	30	9	a	60	10	2			1	110	3	20	7	a	65	10	3
2	2.3	8	35	17	c	70	10	0			2	5.1	5	47	9	a	70	5	1
3	29	6	30	25	c	55	2	2			3	2.6	5	46	30	c	60	3	1
4	124	6	26	11	b	60	5	1			4	92	5	18	16	c	50	5	5
5	4.6	7	52	20	c	100	5	3			5	86	3	29	17	c	60	5	3
6	27	8	44	17	c	120	10	3			6	19	3	26	11	b	60	5	2
7	74	7	34	19	c	185	15	2			7	1.9	5	54	24	c	75	5	1
8	15	5	23	14	b	90	10	2			8	165	4	56	16	c	115	10	0
9	158	7	10	26	c	110	20	7			9	3.8	3	56	23	c	65	5	1
10	102	5	45	15	b	75	10	4			10	33	4	35	16	c	65	2	0
11	15	4	20	10	b	65	5	4			11	120	4	39	25	c	80	20	1
12	1.5	15	40	13	b	90	5	2			12	96	4	16	14	b	85	5	4
13	23	8	32	23	c	110	2	6			13	170	4	11	10	b	75	10	4
14	107	15	61	10	b	95	5	6			14	86	4	63	13	b	80	20	2
15	2.1	6	33	14	b	105	10	3			15	65	4	36	7	a	110	10	0
16	103	7	11	9	a	125	10	5			16	60	4	39	12	b	90	5	0
17	58	8	11	8	a	80	7	6			17	2.4	5	34	5	a	100	2	0
18	2.3	8	20	13	b	70	5	2			18	150	5	35	8	a	65	6	1
19	15	7	20	15	b	70	5	3			19	83	4	27	12	b	95	10	4
20	6	5	25	12	b	60	8	4			20	48	5	25	12	b	85	10	2
21	92	13	25	19	c	135	20	3			21	107	5	17	10	b	60	5	3
22	76	7	15	10	b	75	20	4			22	110	6	34	9	a	105	5	3
23	86	5	8	15	b	110	5	4			23	34	5	22	6	a	80	7	3
24	126	5	37	26	c	85	10	4			24	46	2	17	5	a	40	2	1
25	77	8	18	13	b	75	5	1			25	23	4	18	7	a	55	2	3
26	44	6	49	22	c	155	5	4			26	102	4	52	28	c	100	2	3
27	1.4	5	31	7	a	85	15	1			27	22	5	26	16	c	80	5	3
28	113	11	23	7	a	175	5	3			28	2.9	3	27	19	c	90	10	3
29	119	9	28	10	b	265	30	7			29	3.7	5	24	14	b	85	8	4
30	13	12	28	18	c	55	10	4			30	83	5	16	8	a	75	10	2
31	22	18	18	20	c	125	5	3	术后3天堵管 再手术		31	3.9	5	45	22	c	70	5	5
32	48	6	28	16	c	105	5	2			32	119	5	25	18	c	75	20	5
33	72	10	9	8	a	142	20	7			33	174	5	23	5.5	a	75	10	3
34	2.2	6	20	11	b	100	5	5			34	6.5	6	21	17	c	70	6	3
35	162	6	27	15	b	205	10	5	堵管		35	101	6	25	5.5	a	85	15	7
36	1.6	13	70	30	c	105	15	4			36	97	5	18	13	b	110	10	4
37	4.6	10	26	21	c	175	10	1			37	8	3	23	11.5	b	85	2	1
38	90	5	45	21	c	70	5	3			38	101	4	15.5	7	a	98	20	4
39	76	9	8	21	a	224	5	3	堵管		39	85	5	8	8.5	a	85	8	4
40	3.4	13	26	6	a	95	4	3			40	17	5	25	28	c	75	5	3
41	68	8	20	17	c	55	3	4			41	3.8	4	15	30	c	80	5	1
42	81	5	60	66	c	105	20	3			42	64	4	32	12.5	b	93	5	3
43	3.9	6	42	27	c	110	10	4			43	128	4	21	9.5	a	75	10	3
44	50	6	23	10	b	65	6	5			44	118	5	46	19	c	115	2	5
45	75	5	36	15	b	85	10	5			45	89	4	45	11.5	b	75	10	2
46	165	8	28	8	a	130	50	7	堵管		46	7.3	5	22	16	c	80	5	1
47	145	14	39	11	b	275	50	8	堵管		47	61	5	23	18.5	c	90	2	1
48	116	6	40	28	c	90	30	3			48	112	5	24.5	11	b	95	2	3
49	61	7	10	7	a	130	10	7			49	106	6	33.5	36	c	95	5	5
50	143	7	15	26	c	185	20	3			50	77	6	47.5	12	b	90	10	3
51	163	5	48	7	a	85	20	2			51	64	5	12	9.5	a	75	5	5
52	68	26	13	5	a	85	20	2	堵管		52	54	5	37	14	b	75	20	5
53	128	5	42	15	b	80	20	3			53	84	15	37	20	c	85	2	3	堵管；再手术
54	93	4	20	5	a	70	5	2			54	88	6	23	7.5	a	85	20	3
55	8.3	13	30	27	c	115	10	10	堵管		55	3.1	6	38	8.5	a	95	10	4
56	4.9	9	61	30	c	155	20	3			56	126	5	13.5	5	a	120	2	5
57	134	7	14	10	b	130	5	4			57	72	5	25	14	b	110	5	4
											58	161	5	12.5	7.5	a	130	10	4
											59	64	4	10	5.5	a	95	10	2
											60	60	6	24	9.5	a	85	20	5
											61	19	7	26	15.5	c	110	10	3
											62	27	6	22	6.5	a	110	10	5
											63	35	5	25	33	c	120	10	3

## Sheet: Sheet2
标准	年龄（月）				小切口	年龄（月）
	70	1.4				110	1.9
	2.3	165				5.1	174
	29	64.4754	64.48±52.19			2.6	67.746	67.75±48.97
	124	52.1883				92	48.9652				积水程度	分组	人数
	4.6	52.19				86					1	1	3
	27					19					2	1	6
	74					1.9					3	1	4
	15					165					4	1	44
	158					3.8					1	2	1
	102					33					2	2	5
	15					120					3	2	9
	1.5					96					4	2	48
	23					170
	107					86
	2.1					65
	103					60
	58					2.4
	2.3					150
	15					83				程度	标准	小切口
	6					48				1	0	0
	92					107				2	0	0
	76					110				3	0	0
	86					34				4	0	0
	126					46
	77					23
	44					102
	1.4					22
	113					2.9
	119					3.7
	13					83
	22					3.9
	48					119
	72					174
	2.2					6.5
	162					101
	1.6					97
	4.6					8
	90					101
	76					85
	3.4					17
	68					3.8
	81					64
	3.9					128
	50					118
	75					89
	165					7.3
	145					61
	116					112
	61					106
	143					77
	163					64
	68					54
	128					84
	93					88
	8.3					3.1
	4.9					126
	134					72
						161
						64
						60
						19
						27
						35
